# Supplementary material for: The Association Between National Institutes of Health Stroke Scale Score and Clinical Outcome in Patients with Large Core Infarctions Undergoing Endovascular Treatment
Source: Springer Nature journal article supplement (doi:10.1007/s40120-024-00588-8), 2024-03-01
Supplement: MOESM1 [file 26809658]

## SUPPLEMENTARY MATERIAL

### **The association between National Institutes of Health Stroke Scale score and clinical outcome in patients with large core infarctions undergoing endovascular treatment**

#### **Authors:**

Lingyu Zhang<sup>a,b,1</sup>; Jinfu Ma<sup>c,1</sup>; Mengmeng Wang<sup>a,b</sup>; Lin Zhang<sup>d</sup>; Wenzhe Sun<sup>c</sup>;  
Honghong Ji<sup>b,c</sup>; Chengsong Yue<sup>c</sup>; Jiacheng Huang<sup>c</sup>; Wenjie Zi<sup>c</sup>; Fengli Li<sup>c</sup>; Changwei  
Guo<sup>c#</sup>; Pengfei Wang<sup>b#</sup>;

#### **Authors and affiliations:**

<sup>1</sup>Lingyu Zhang and Jinfu Ma contributed equally.

<sup>#</sup>Pengfei Wang and Changwei Guo are the corresponding authors.

<sup>a</sup>School of Clinical Medicine, Shandong Second Medical University, Weifang 261000, Shandong, China;

<sup>b</sup>Department of Neurology, Weihai Municipal Hospital, Cheeloo College of Medicine, Shandong University, Weihai, China;

<sup>c</sup>Department of Neurology, Xinqiao Hospital and The Second Affiliated Hospital, Army Medical University (Third Military Medical University), Chongqing400037, China;

<sup>d</sup>Department of Cardiology, Yantai Penglai Hospital of Traditional Chinese Medicine, Yantai, China;

<sup>e</sup>The Second School of Clinical Medicine of Binzhou Medical University, Yantai, Shandong, China

**Corresponding author:**

Pengfei Wang, Department of Neurology, Weihai Municipal Hospital, Cheeloo College of Medicine, Shandong University, No.70, Heping road, Huancui District, Weihai City, Shandong Province, China.

Email: [wpf5287598@163.com](mailto:wpf5287598@163.com)

Changwei Guo, Department of Neurology, Xinqiao Hospital and The Second Affiliated Hospital, Army Medical University (Third Military Medical University), Chongqing400037, China.

Email: [changw\\_guo@163.com](mailto:changw_guo@163.com)

**eTable1.** Multivariable Linear Regression shows the Predictors of baseline NIHSS

**etable2.** Participating Center

**eFigure1.** Flowchart

**eFigure2.** Distribution of Modified Rankin Scale Scores at 90 Days and successful recanalization

**eFigure3.** Subgroup Analysis

**eFigure4.** Association of Baseline National Institutes of Health Stroke Scale Score with Percentage of Death

**eTable1. Multivariable Linear Regression shows the Predictors of baseline NIHSS**

| Variable | Estimate | Standard | P | Estimate | Standard | P |
|----------|----------|----------|---|----------|----------|---|
|----------|----------|----------|---|----------|----------|---|

|                            | <b>Effect</b> | <b>Error</b> | <b>value</b> | <b>Effect <sup>a</sup></b> | <b>Error <sup>a</sup></b> | <b>value <sup>a</sup></b> |
|----------------------------|---------------|--------------|--------------|----------------------------|---------------------------|---------------------------|
| <b>Age</b>                 | 0.071         | 0.019        | <0.001       | 0.063                      | 0.022                     | 0.004                     |
| <b>Sex</b>                 | -1.426        | 0.462        | <0.001       | -1.310                     | 0.542                     | 0.016                     |
| <b>Hypertension</b>        | 0.264         | 0.472        | 0.576        | -0.099                     | 0.487                     | 0.839                     |
| <b>Hyperlipidemia</b>      | -1.694        | 0.555        | 0.002        | -1.555                     | 0.539                     | 0.004                     |
| <b>Diabetes</b>            | 0.023         | 0.648        | 0.972        | -0.153                     | 0.639                     | 0.811                     |
| <b>Atrial fibrillation</b> | 1.234         | 0.460        | 0.008        | 0.146                      | 0.495                     | 0.768                     |
| <b>Smoking</b>             | -0.957        | 0.497        | 0.055        | 0.649                      | 0.574                     | 0.258                     |
| <b>Occlusion site</b>      | -1.053        | 0.351        | 0.003        | -0.546                     | 0.365                     | 0.135                     |
| <b>Toast</b>               | -0.066        | 0.201        | 0.743        | -0.004                     | 0.201                     | 0.985                     |
| <b>SBP</b>                 | 0.018         | 0.009        | 0.044        | -0.009                     | 0.011                     | 0.433                     |
| <b>DBP</b>                 | 0.037         | 0.015        | 0.011        | 0.038                      | 0.018                     | 0.032                     |
| <b>IVT</b>                 | 0.373         | 0.533        | 0.485        | 0.737                      | 0.516                     | 0.154                     |
| <b>ASITN/SIR</b>           | -1.075        | 0.234        | <0.001       | -0.621                     | 0.251                     | 0.014                     |
| <b>ASPECTS</b>             | -0.600        | 0.139        | <0.001       | -0.508                     | 0.139                     | <0.001                    |

Note:

Abbreviations: ASPECTS=Alberta Stroke Program Early Computed Tomography Score; SBP=Systolic pressure; DBP= diastolic pressure; ASITN/SIR=the American Society of Interventional and Therapeutic Neuroradiology/Society of Interventional Radiology collateral score; Toast= Trial of Org 10172 in Acute Stroke Treatment.

<sup>a</sup> Adjusted estimates of NIHSS score were calculated using linear regression, taking the following variables into account: age, sex, medical history including hypertension, hyperlipidemia, diabetes, atrial fibrillation, baseline ASPECTS, occlusion site, toast, ASITN/SIR, intravenous thrombolysis, SBP, DBP, and smoking.

**eTable 2. Participating Center**

|   |                                                          |
|---|----------------------------------------------------------|
| 1 | Bazhong Central Hospital                                 |
| 2 | Bazhongshi zhongyiyuan Bazhongshi Bazhouqu Renmin Yiyuan |
| 3 | Chongzhou Hospital                                       |

|    |                                                         |
|----|---------------------------------------------------------|
| 4  | Affiliated Hospital of North Sichuan Medical College    |
| 5  | Dali Bai Autonomous Prefecture People's Government      |
| 6  | Dongguan People's Hospital                              |
| 7  | Nanfang Hospital, Ganzhou                               |
| 8  | Guang yuan Central Hospital                             |
| 9  | Hospital 302 Attached to Guizhou Aviation Group         |
| 10 | Guiping People's Hospital                               |
| 11 | The Third People's Hospital of Hubei Province           |
| 12 | Hubei Provincial Hospital of TCM                        |
| 13 | Huainan First People's Hospital                         |
| 14 | The First Bethune Hospital of Jilin University          |
| 15 | Jiangmen Central Hospital                               |
| 16 | Jingdezhen NO.1 People's Hospital                       |
| 17 | The First Hospital of Liangshan                         |
| 18 | Maoming Central Hospital                                |
| 19 | Meishan City People's Hospital                          |
| 20 | Mianyang Central Hospital                               |
| 21 | Sichuan Mianyang 404 Hospital                           |
| 22 | Nanbu People's Hospital                                 |
| 23 | The people's Hospital of PingChang                      |
| 24 | Qian Xi Nan People's Hospital                           |
| 25 | Qujing NO.1 Hospital                                    |
| 26 | The People's Hospital of Renshou County                 |
| 27 | Shantou Central Hospital                                |
| 28 | Suining First People's Hospital                         |
| 29 | Weihai Municipal Hospital                               |
| 30 | Wuhan NO.1 Hospital                                     |
| 31 | The Affiliated Hospital of Southwest Medical University |
| 32 | Xiangtan Central Hospital                               |
| 33 | Xiangyang NO.1 People's Hospital                        |
| 34 | Xinqiao Hospital Army Medical University                |
| 35 | Xinyi People's Hospital                                 |
| 36 | The First People's Hospital of Yibin                    |
| 37 | The First Affiliated Hospital of Wannan Medical College |
| 38 | The First People's Hospital of Yunnan Province          |

**eFigure1. Flowchart.**

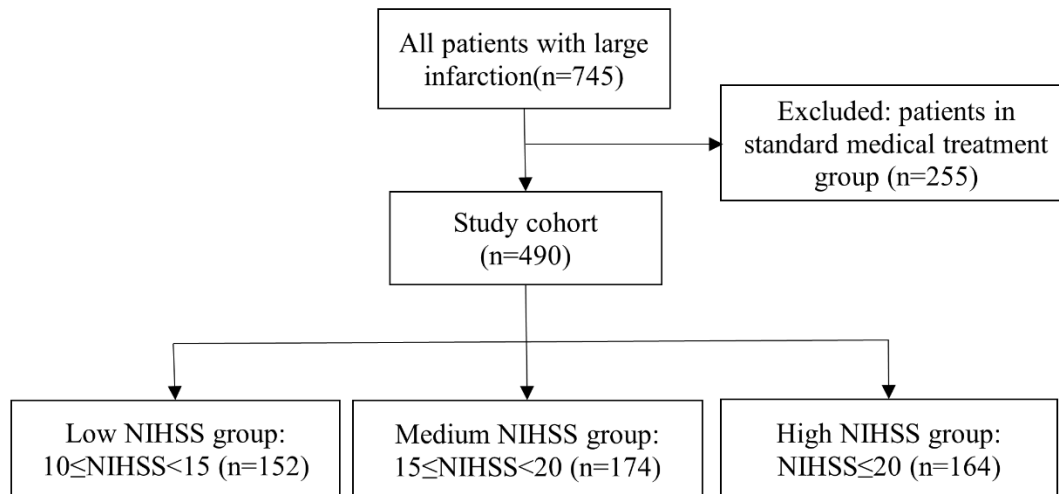

**eFigure2. Distribution of Modified Rankin Scale Scores at 90 Days and successful**

recanalization.

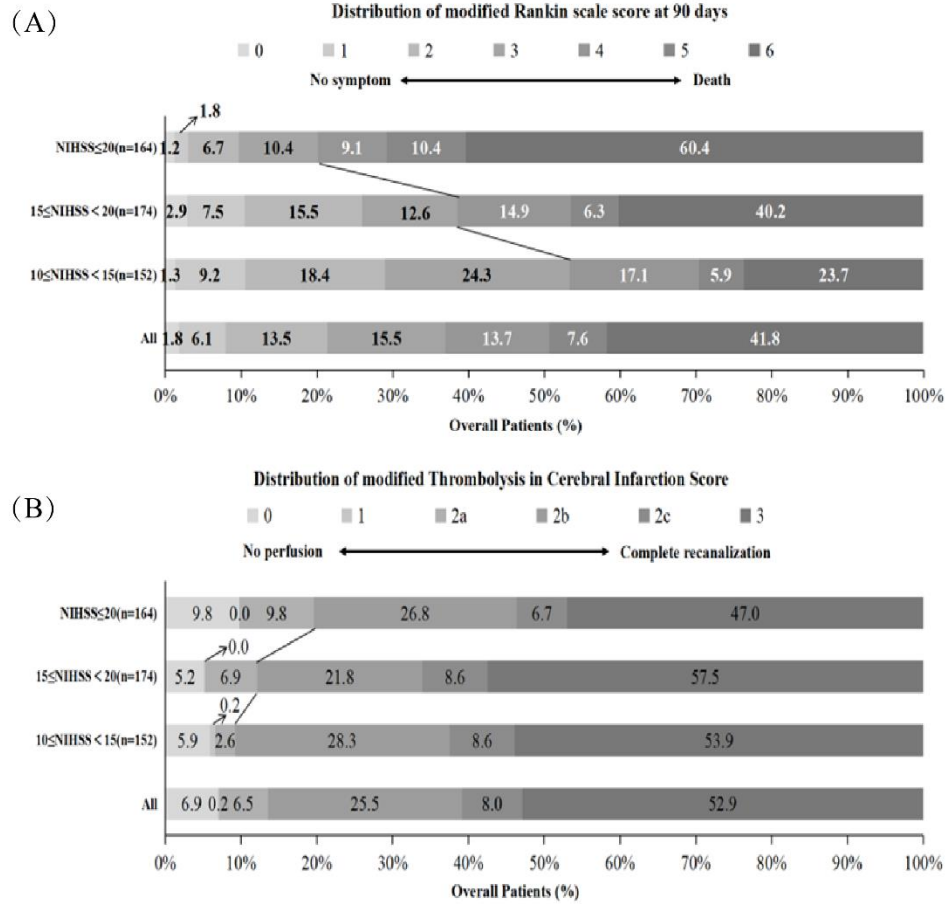

Distribution of modified Rankin Scale scores at 90 days according to baseline NIHSS in (A) all patients and (B) patients with successful recanalization.

eFigure3. Subgroup Analysis.

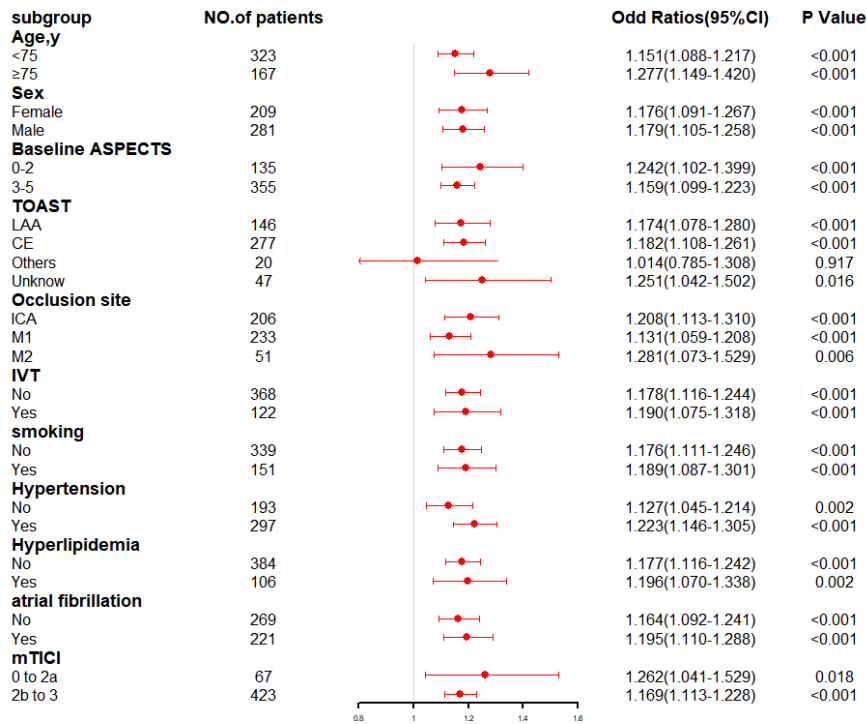

This forest plot shows that the primary clinical outcome (common odds ratio indicating the odds of improvement of 1 point on the modified Rankin Scale at 90 days, analyzed with the use of ordinal logistic regression) in all prespecified subgroups.

Abbreviations: ASPECTS=Alberta Stroke Program Early Computed Tomography Score; TOAST=Trial of Org 10172 in Acute Stroke Treatment; ICA=Internal carotid artery; M1=M1 of middle cerebral artery; M2=M2 of middle cerebral artery; IVT= Intravenous thrombolysis; mTICI=modified Thrombolysis in Cerebral Infarction Score.



**eFigure4. Association of Baseline National Institutes of Health Stroke Scale Score with Percentage of Death.**

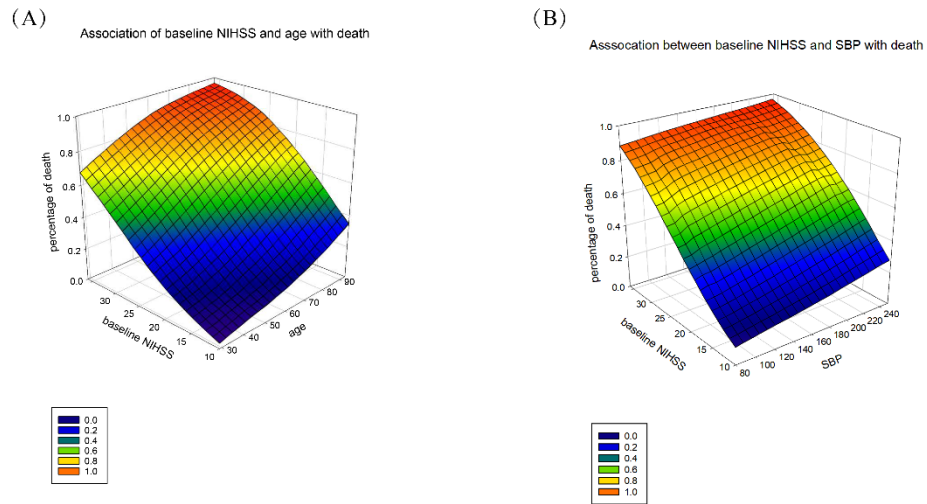

Association between baseline NIHSS and age (A) and SBP (B) with the percentage of death after EVT in the patients with large core infarctions. There is an increase in the likelihood of death with increase in the baseline NIHSS score while the outcome probability is roughly stable over the age and systolic blood pressure.
